# Supplementary material for: Phytophthora podocarpi sp. nov. from Diseased Needles and Shoots of Podocarpus in New Zealand
Source: MDPI journal article supplement (doi:10.3390/f13020214), 2022-01-31
Supplement: s1 [file s1]

Archive with 1 entries (1 files):
- forests-1547267-supplementary.pdf
