# Supplementary material for: Phytophthora podocarpi sp. nov. from Diseased Needles and Shoots of Podocarpus in New Zealand
Source: MDPI journal article supplement (doi:10.3390/f13020214), 2022-01-31
Supplement: s1 [file s1 › forests-1547267-supplementary.pdf]

**Supplementary Table S1.** Nucleotide substitution model selection per gene and partitions selected by AIC (MrModeltest).

| Gene locus                    | Nucleotide substitution model (2 <sup>nd</sup> best) |
|-------------------------------|------------------------------------------------------|
| 28S rDNA                      | TIM3+I+G (GTR+I+G)                                   |
| 60S ribosomal protein         | TIM3+I+G (GTR+I+G)                                   |
| $\beta$ -tubulin              | GTR+I+G                                              |
| elongation factor 1- $\alpha$ | TIM3+I+G (GTR+I+G)                                   |
| enolase                       | GTR+I+G                                              |
| heat shock protein 90         | GTR+I+G                                              |
| tigA gene fusion              | TIM3+I+G (GTR+I+G)                                   |

Nucleotide substitution models determined by MrModeltest v2.0 using the AIC, after creating partitions corresponding to each individual gene fragment for phylogenetic analysis.

**Supplementary Figure S1.** A multilocus phylogeny of *Phytophthora* showing the placement of the two *P. podocarpi* isolates in clade 15 along with downy mildew, *Peronospora hyoscyami* (*Peronospora tabacina*). Complete or partial DNA sequences from seven gene loci (28S rDNA, 60S ribosomal protein,  $\beta$ -tubulin, elongation factor 1- $\alpha$ , enolase, heat shock protein 90, tigA gene fusion) were used to infer phylogeny with MrBayes in Geneious Pro v9.0. Support is displayed as posterior probability values on the nodes. Scale bar shows number of substitutions per site.

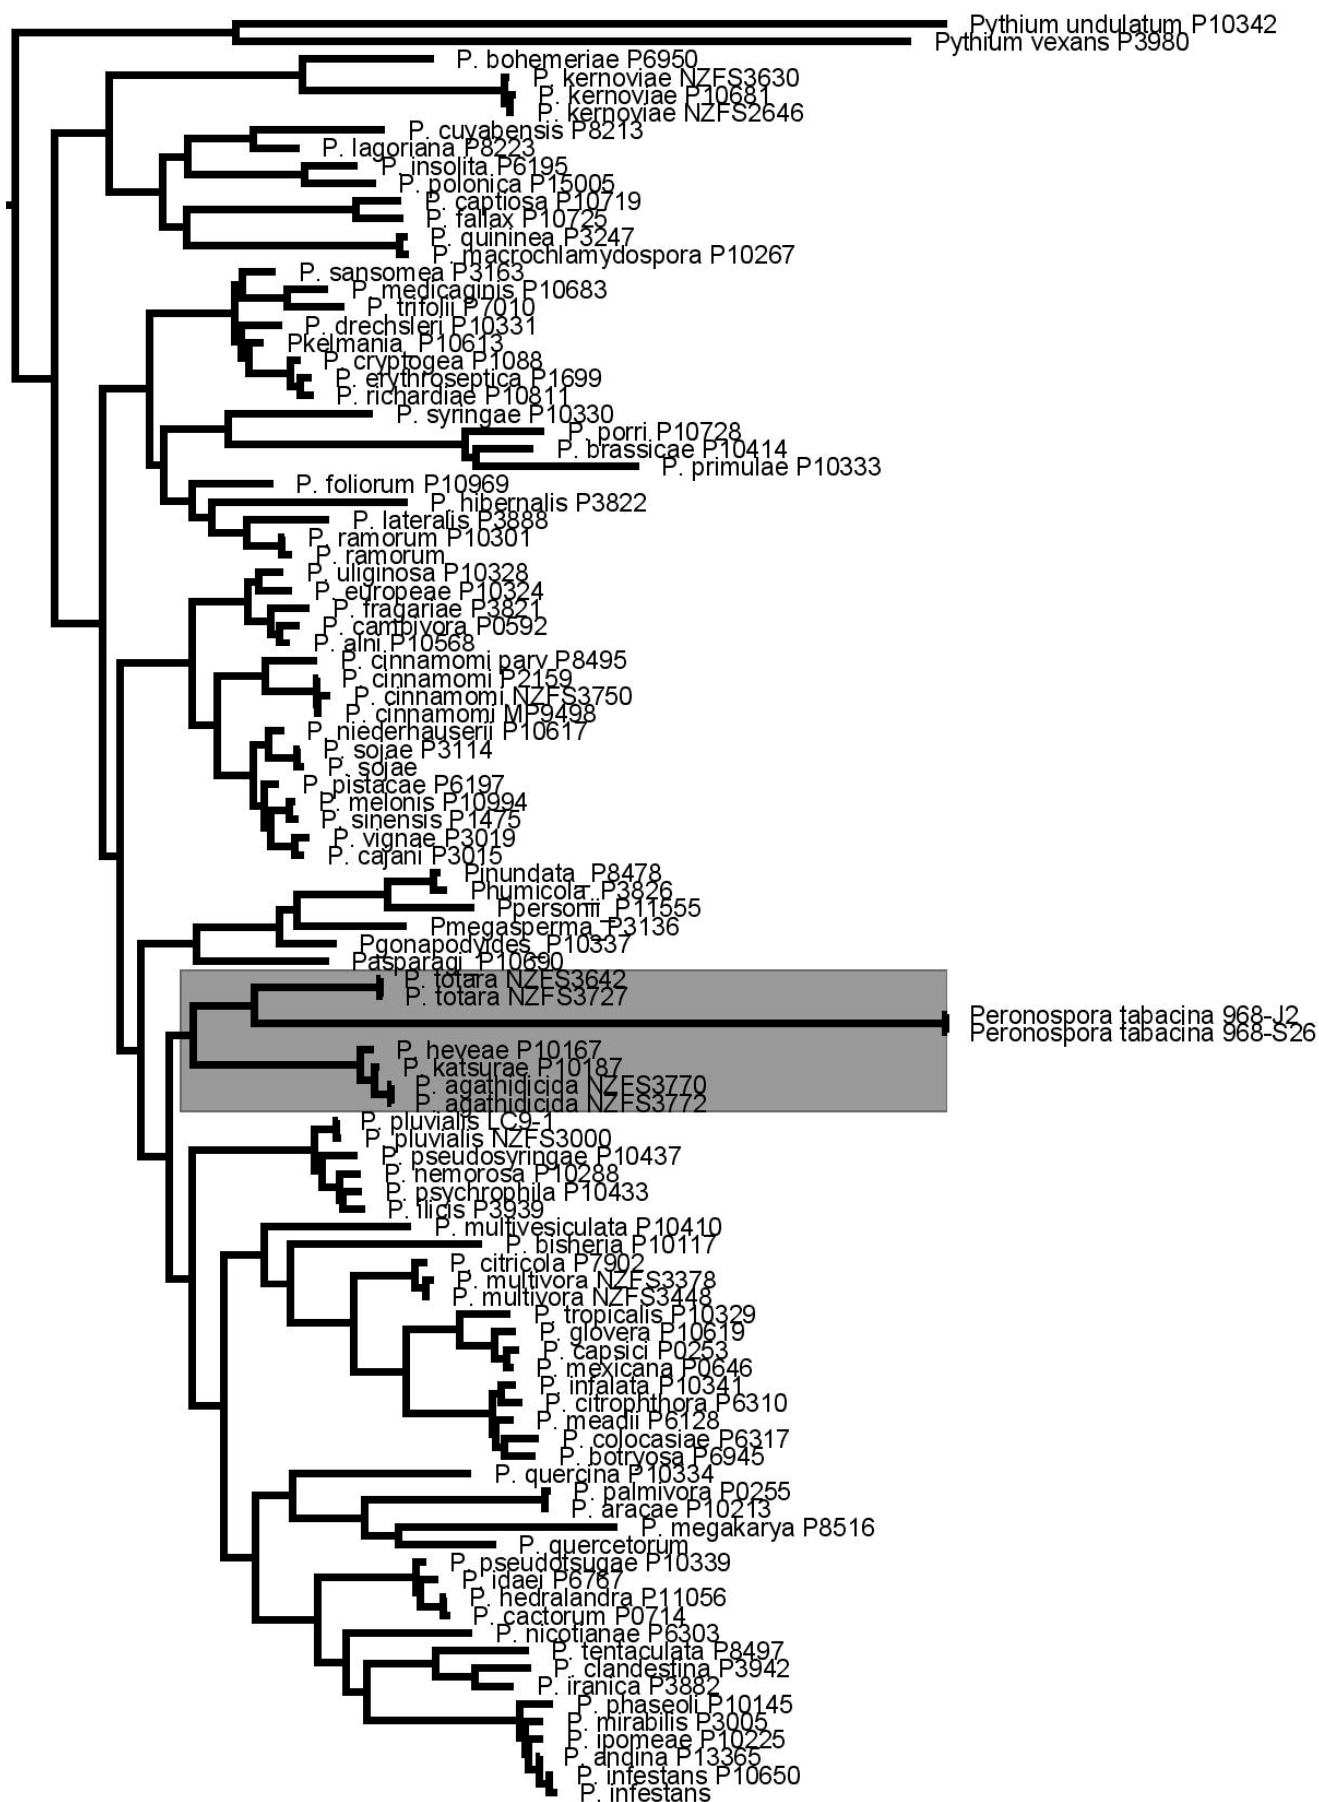

0.03
